# Supplementary material
Source: PubMed Central journal article supplement (PMC7657649)
Supplement: NIHMS1579947-supplement-1.pdf [file NIHMS1579947-supplement-1.pdf]

## Maternal serum perfluoroalkyl substance mixtures and thyroid hormone concentrations in maternal and cord sera: The HOME Study

Rebecca M. Lebeaux<sup>a</sup>, Brett T. Doherty<sup>a</sup>, Lisa G. Gallagher<sup>b</sup>, R. Thomas Zoeller<sup>c</sup>, Andrew N. Hoofnagle<sup>d</sup>, Antonia M. Calafat<sup>e</sup>, Margaret R. Karagas<sup>a</sup>, Kimberly Yolton<sup>f</sup>, Aimin Chen<sup>g</sup>, Bruce P. Lanphear<sup>h</sup>, Joseph M. Braun<sup>i</sup>, and Megan E. Romano<sup>a \*</sup>

### Table of Contents

|                                                                                                                                                                                       |     |
|---------------------------------------------------------------------------------------------------------------------------------------------------------------------------------------|-----|
| <b>Table S1:</b> Expanded table of maternal and newborn characteristics.....                                                                                                          | 2-4 |
| <b>Table S2:</b> Baseline characteristics by gestational age of PFAS measurement among mother-infant dyads with at least one thyroid hormone measured ( $n = 305$ ).....              | 5   |
| <b>Table S3:</b> Association between PFAS exposure and thyroid hormones measured in maternal and cord sera across multivariable models.....                                           | 6   |
| <b>Table S4:</b> Associations between PFASs and thyroid hormones by thyroid antibody levels.....                                                                                      | 7-9 |
| <b>Table S5:</b> Associations between PFASs and thyroid hormones by iodine deficiency status.....                                                                                     | 10  |
| <b>Figure S1:</b> Flow chart of study participants in the HOME Study by available PFAS, thyroid, and covariate exposures.....                                                         | 11  |
| <b>Figure S2:</b> Correlation between PFAS, BDE-28, BDE-47, and PCB-153.....                                                                                                          | 12  |
| <b>Figure S3:</b> Adjusted association of the overall PFAS mixture on $\log_2$ -transformed maternal FT <sub>3</sub> from BKMR analysis ( $n = 171$ ). .....                          | 13  |
| <b>Figure S4:</b> Interactions between exposures within the $\log_2$ -transformed cord serum FT <sub>4</sub> BKMR model ( $n = 236$ ).....                                            | 14  |
| <b>Figure S5:</b> Adjusted associations of $\log_2$ -transformed PFAS, BDE-28, BDE-47, and PCB-153 as exposures on $\log_2$ -transformed cord serum TSH using BKMR ( $n = 202$ )..... | 15  |
| <b>Figure S6:</b> Adjusted association of the overall PFAS mixture on cord serum TSH. ....                                                                                            | 16  |

**Table S1:** Expanded table of maternal and newborn characteristics.

|                            | Women with cord serum thyroid hormone measurements |                             |                         |                         |                          | Women with maternal serum thyroid hormone measurements |                             |                         |                         |                          |
|----------------------------|----------------------------------------------------|-----------------------------|-------------------------|-------------------------|--------------------------|--------------------------------------------------------|-----------------------------|-------------------------|-------------------------|--------------------------|
|                            | <i>n</i> (%)                                       | PFAS Concentrations (ng/mL) |                         |                         |                          | <i>n</i> (%)                                           | PFAS Concentrations (ng/mL) |                         |                         |                          |
|                            |                                                    | PFOA<br>median<br>(IQR)     | PFOS<br>median<br>(IQR) | PFNA<br>median<br>(IQR) | PFHxS<br>median<br>(IQR) |                                                        | PFOA<br>median<br>(IQR)     | PFOS<br>median<br>(IQR) | PFNA<br>median<br>(IQR) | PFHxS<br>median<br>(IQR) |
| Overall                    | 256                                                | 5.6 (4.1)                   | 14.3 (8.1)              | 0.9 (0.5)               | 1.6 (1.5)                | 185                                                    | 5.5 (4.5)                   | 14.3 (8.9)              | 0.9 (0.4)               | 1.6 (1.5)                |
| Maternal Age (years)       |                                                    |                             |                         |                         |                          |                                                        |                             |                         |                         |                          |
| <25                        | 51 (20)                                            | 6.3 (3.5)                   | 14.8 (7.3)              | 0.9 (0.6)               | 1.5 (1.6)                | 37 (20)                                                | 6.4 (3.6)                   | 13.4 (8.9)              | 0.8 (0.3)               | 1.5 (1.2)                |
| 25-35                      | 165 (65)                                           | 5.3 (3.4)                   | 13.4 (8.2)              | 0.9 (0.5)               | 1.6 (1.5)                | 114 (62)                                               | 5.1 (4.0)                   | 14.7 (9.3)              | 0.9 (0.4)               | 1.5 (1.7)                |
| >35                        | 40 (16)                                            | 7.3 (5.4)                   | 15.0 (8.7)              | 1.1 (0.5)               | 1.7 (1.1)                | 34 (18)                                                | 6.8 (5.1)                   | 14.5 (8.9)              | 1.0 (0.5)               | 1.8 (0.9)                |
| Race/Ethnicity             |                                                    |                             |                         |                         |                          |                                                        |                             |                         |                         |                          |
| Non-Hispanic White         | 165 (65)                                           | 6.0 (5.0)                   | 14.4 (8.2)              | 1.0 (0.5)               | 1.8 (1.6)                | 116 (63)                                               | 5.9 (5.2)                   | 15.3 (9.6)              | 0.9 (0.5)               | 1.8 (1.8)                |
| Black                      | 70 (27)                                            | 5.0 (2.5)                   | 13.0 (8.7)              | 0.8 (0.4)               | 1.0 (0.7)                | 51 (28)                                                | 4.8 (2.5)                   | 10.1 (9.5)              | 0.8 (0.4)               | 0.9 (0.9)                |
| Other                      | 20 (8)                                             | 5.9 (4.3)                   | 15.3 (8.8)              | 1.1 (1.0)               | 1.8 (1.8)                | 17 (9)                                                 | 6.0 (4.7)                   | 15.1 (7.3)              | 1.0 (1.1)               | 1.8 (1.3)                |
| Missing                    | 1 (0)                                              | 4.8 (0.0)                   | 14.8 (0.0)              | 0.6 (0.0)               | 2.7 (0.0)                | 1 (1)                                                  | 11.6 (0.0)                  | 13.2 (0.0)              | 0.8 (0.0)               | 2.1 (0.0)                |
| Marital Status             |                                                    |                             |                         |                         |                          |                                                        |                             |                         |                         |                          |
| Married                    | 185 (72)                                           | 5.9 (4.8)                   | 14.6 (8.4)              | 1.0 (0.5)               | 1.7 (1.4)                | 128 (69)                                               | 5.9 (5.2)                   | 15.3 (9.3)              | 1.0 (0.5)               | 1.8 (1.9)                |
| Unmarried, cohabiting      | 26 (10)                                            | 5.3 (3.4)                   | 13.5 (9.4)              | 0.9 (0.5)               | 1.0 (1.0)                | 19 (10)                                                | 4.0 (2.3)                   | 10.1 (7.0)              | 0.8 (0.4)               | 0.9 (0.8)                |
| Unmarried, living alone    | 44 (17)                                            | 5.2 (3.1)                   | 13.3 (7.4)              | 0.8 (0.4)               | 1.1 (1.3)                | 37 (20)                                                | 5.8 (3.6)                   | 13.4 (8.6)              | 0.8 (0.3)               | 1.1 (1.4)                |
| Missing                    | 1 (0)                                              | 4.8 (0.0)                   | 14.8 (0.0)              | 0.6 (0.0)               | 2.7 (0.0)                | 1 (1)                                                  | 11.6 (0.0)                  | 13.2 (0.0)              | 0.8 (0.0)               | 2.1 (0.0)                |
| Household Income (\$/year) |                                                    |                             |                         |                         |                          |                                                        |                             |                         |                         |                          |
| <20,000                    | 48 (19)                                            | 5.1 (3.3)                   | 11.9 (7.3)              | 0.8 (0.4)               | 1.0 (1.3)                | 38 (21)                                                | 4.8 (3.7)                   | 9.0 (9.2)               | 0.7 (0.3)               | 0.9 (1.0)                |
| 20-<40,000                 | 43 (17)                                            | 5.5 (3.7)                   | 14.2 (9.4)              | 1.0 (0.6)               | 1.4 (1.8)                | 35 (19)                                                | 5.5 (3.2)                   | 13.3 (10.2)             | 0.9 (0.5)               | 1.4 (1.8)                |
| 40-<80,000                 | 87 (34)                                            | 5.7 (3.9)                   | 14.6 (7.3)              | 1.0 (0.5)               | 1.7 (1.5)                | 57 (31)                                                | 5.1 (4.4)                   | 14.8 (8.2)              | 1.0 (0.5)               | 1.8 (1.8)                |
| >80,000                    | 77 (30)                                            | 6.3 (5.5)                   | 15.0 (9.7)              | 1.0 (0.4)               | 1.7 (1.2)                | 54 (29)                                                | 6.3 (5.3)                   | 16.1 (12.8)             | 1.0 (0.4)               | 1.7 (1.0)                |
| Missing                    | 1 (0)                                              | 4.8 (0.0)                   | 14.8 (0.0)              | 0.6 (0.0)               | 2.7 (0.0)                | 1 (1)                                                  | 11.6 (0.0)                  | 13.2 (0.0)              | 0.8 (0.0)               | 2.1 (0.0)                |

**Table S1 (cont.):** Expanded table of maternal and newborn characteristics.

|                                   |          |           |             |           |           |          |            |             |           |           |
|-----------------------------------|----------|-----------|-------------|-----------|-----------|----------|------------|-------------|-----------|-----------|
| Education                         |          |           |             |           |           |          |            |             |           |           |
| Less than high school             | 54 (21)  | 5.4 (3.3) | 13.3 (8.6)  | 0.9 (0.4) | 1.2 (1.3) | 43 (23)  | 4.9 (4.8)  | 10.1 (7.9)  | 0.8 (0.4) | 1.2 (1.2) |
| High school or some college       | 64 (25)  | 5.6 (4.1) | 14.4 (8.5)  | 1.0 (0.6) | 1.4 (1.9) | 38 (21)  | 6.1 (3.5)  | 15.0 (8.5)  | 0.9 (0.5) | 1.6 (2.5) |
| Bachelor's or more                | 137 (54) | 5.7 (4.4) | 14.4 (8.6)  | 0.9 (0.5) | 1.7 (1.3) | 103 (56) | 5.6 (4.6)  | 15.1 (9.0)  | 1.0 (0.5) | 1.7 (1.8) |
| Missing                           | 1 (0)    | 4.8 (0.0) | 14.8 (0.0)  | 0.6 (0.0) | 2.7 (0.0) | 1 (1)    | 11.6 (0.0) | 13.2 (0.0)  | 0.8 (0.0) | 2.1 (0.0) |
| Insurance                         |          |           |             |           |           |          |            |             |           |           |
| Private                           | 198 (77) | 5.9 (4.9) | 14.7 (8.4)  | 1.0 (0.5) | 1.7 (1.5) | 140 (76) | 5.7 (5.1)  | 15.2 (9.3)  | 1.0 (0.5) | 1.7 (1.9) |
| Public/uninsured                  | 57 (22)  | 5.3 (3.1) | 12.6 (6.9)  | 0.8 (0.4) | 0.9 (1.0) | 44 (24)  | 5.1 (3.2)  | 9.7 (7.5)   | 0.8 (0.4) | 0.9 (0.9) |
| Missing                           | 1 (0)    | 4.8 (0.0) | 14.8 (0.0)  | 0.6 (0.0) | 2.7 (0.0) | 1 (1)    | 11.6 (0.0) | 13.2 (0.0)  | 0.8 (0.0) | 2.1 (0.0) |
| Prenatal vitamins                 |          |           |             |           |           |          |            |             |           |           |
| Regular use                       | 223 (87) | 5.8 (4.4) | 14.3 (8.0)  | 0.9 (0.5) | 1.6 (1.6) | 163 (88) | 5.7 (4.7)  | 14.6 (8.8)  | 0.9 (0.5) | 1.6 (1.6) |
| Never/infrequent use              | 32 (13)  | 5.1 (1.7) | 11.3 (7.6)  | 0.9 (0.4) | 1.2 (1.1) | 21 (11)  | 4.8 (2.2)  | 10.2 (10.6) | 0.8 (0.4) | 1.3 (1.1) |
| Missing                           | 1 (0)    | 4.8 (0.0) | 14.8 (0.0)  | 0.6 (0.0) | 2.7 (0.0) | 1 (1)    | 11.6 (0.0) | 13.2 (0.0)  | 0.8 (0.0) | 2.1 (0.0) |
| Alcohol consumption               |          |           |             |           |           |          |            |             |           |           |
| Any                               | 100 (39) | 6.4 (4.6) | 14.8 (7.7)  | 0.9 (0.4) | 1.7 (1.9) | 73 (40)  | 5.6 (4.4)  | 14.6 (8.5)  | 0.9 (0.4) | 1.6 (2.0) |
| None                              | 147 (57) | 5.2 (3.7) | 13.6 (8.8)  | 0.9 (0.5) | 1.5 (1.5) | 108 (58) | 5.4 (3.8)  | 14.3 (9.7)  | 0.9 (0.5) | 1.5 (1.5) |
| Missing                           | 9 (4)    | 8.2 (3.2) | 13.8 (5.9)  | 1.2 (1.0) | 1.7 (1.3) | 4 (2)    | 10.7 (6.6) | 14.7 (5.9)  | 1.2 (0.6) | 1.7 (0.5) |
| Serum cotinine (ng/mL)            |          |           |             |           |           |          |            |             |           |           |
| <0.015 (Unexposed)                | 110 (43) | 5.6 (4.3) | 14.4 (7.7)  | 1.0 (0.5) | 1.7 (1.4) | 73 (40)  | 5.3 (5.0)  | 15.2 (9.6)  | 1.0 (0.4) | 1.7 (1.5) |
| 0.015-3 (Secondhand)              | 120 (47) | 5.9 (4.0) | 14.5 (9.1)  | 0.9 (0.5) | 1.5 (1.7) | 90 (49)  | 5.8 (4.0)  | 14.1 (9.0)  | 0.9 (0.5) | 1.5 (1.7) |
| >3 (Active smoker)                | 26 (10)  | 5.1 (3.2) | 12.4 (6.5)  | 0.9 (0.5) | 1.3 (1.2) | 22 (12)  | 5.1 (3.4)  | 10.4 (7.1)  | 0.8 (0.4) | 1.2 (1.2) |
| Maternal BMI (kg/m <sup>2</sup> ) |          |           |             |           |           |          |            |             |           |           |
| <24.9 (Underweight-normal)        | 131 (51) | 5.9 (4.4) | 14.3 (8.2)  | 0.9 (0.5) | 1.7 (1.5) | 102 (55) | 5.9 (4.1)  | 14.9 (9.1)  | 0.9 (0.5) | 1.7 (1.6) |
| 25-29.9 (Overweight)              | 67 (26)  | 5.0 (4.4) | 14.4 (7.1)  | 1.0 (0.6) | 1.6 (1.7) | 44 (24)  | 4.4 (4.9)  | 15.7 (10.7) | 0.9 (0.4) | 1.6 (2.1) |
| ≥30 (Obese)                       | 49 (19)  | 5.6 (3.6) | 13.3 (8.4)  | 0.9 (0.4) | 1.4 (1.5) | 31 (17)  | 5.6 (3.8)  | 13.2 (10.3) | 0.9 (0.4) | 1.5 (1.6) |
| Missing                           | 9 (4)    | 4.8 (2.2) | 12.3 (4.9)  | 0.7 (0.3) | 1.7 (1.2) | 8 (4)    | 6.0 (4.0)  | 8.8 (4.5)   | 0.8 (0.3) | 1.4 (1.1) |
| Mode of delivery                  |          |           |             |           |           |          |            |             |           |           |
| Vaginal delivery                  | 187 (73) | 5.5 (3.8) | 14.2 (7.7)  | 0.9 (0.5) | 1.5 (1.5) | 128 (69) | 5.6 (4.5)  | 14.7 (9.4)  | 0.9 (0.4) | 1.5 (1.5) |
| Cesarean section                  | 66 (26)  | 6.0 (3.9) | 14.3 (10.0) | 0.9 (0.5) | 1.7 (1.7) | 56 (30)  | 5.5 (4.5)  | 13.7 (10.2) | 0.9 (0.5) | 1.8 (2.1) |

**Table S1 (cont.):** Expanded table of maternal and newborn characteristics.

|                           |          |           |             |           |           |          |            |             |           |           |
|---------------------------|----------|-----------|-------------|-----------|-----------|----------|------------|-------------|-----------|-----------|
| Missing                   | 3 (1)    | 9.2 (5.8) | 15.7 (4.0)  | 1.2 (0.8) | 2.9 (1.3) | 1 (1)    | 13.1 (0.0) | 14.0 (0.0)  | 1.2 (0.0) | 1.7 (0.0) |
| Parity                    |          |           |             |           |           |          |            |             |           |           |
| Nulliparous               | 108 (42) | 5.9 (4.3) | 13.7 (7.7)  | 0.9 (0.5) | 1.5 (1.4) | 83 (45)  | 6.1 (4.6)  | 14.7 (8.8)  | 0.9 (0.4) | 1.7 (1.7) |
| Primiparous               | 77 (30)  | 5.6 (3.8) | 14.3 (10.4) | 0.9 (0.5) | 1.6 (1.5) | 50 (27)  | 5.0 (4.0)  | 14.6 (11.4) | 1.0 (0.4) | 1.5 (1.5) |
| Multiparous               | 65 (25)  | 5.2 (4.0) | 14.3 (7.0)  | 0.9 (0.5) | 1.5 (1.4) | 48 (26)  | 5.1 (4.3)  | 13.6 (9.0)  | 0.8 (0.5) | 1.6 (1.6) |
| Missing                   | 6 (2)    | 7.6 (3.7) | 14.7 (1.9)  | 1.1 (0.5) | 2.3 (1.4) | 4 (2)    | 7.6 (4.8)  | 14.7 (4.8)  | 1.2 (0.3) | 1.7 (3.3) |
| Newborn Sex               |          |           |             |           |           |          |            |             |           |           |
| Female                    | 135 (53) | 5.5 (4.1) | 14.3 (8.3)  | 0.9 (0.5) | 1.6 (1.7) | 101 (55) | 5.3 (4.4)  | 14.3 (9.1)  | 0.9 (0.5) | 1.5 (1.6) |
| Male                      | 121 (47) | 5.7 (3.7) | 14.2 (8.6)  | 0.9 (0.5) | 1.5 (1.5) | 84 (45)  | 5.8 (4.5)  | 14.7 (9.0)  | 0.9 (0.4) | 1.7 (1.5) |
| Maternal urinary iodine   |          |           |             |           |           |          |            |             |           |           |
| Normal ( $\geq 100$ ug/L) | 139 (54) | 5.6 (4.4) | 14.8 (10.4) | 1.0 (0.6) | 1.6 (1.4) | 109 (59) | 5.5 (4.5)  | 15.1 (10.3) | 0.9 (0.5) | 1.6 (1.3) |
| Low (<100 ug/L)           | 57 (22)  | 6.2 (3.5) | 13.2 (6.6)  | 0.9 (0.5) | 1.6 (2.0) | 38 (21)  | 7.1 (4.3)  | 14.5 (7.8)  | 1.0 (0.4) | 2.1 (2.2) |
| Missing                   | 60 (23)  | 5.4 (3.9) | 13.7 (7.3)  | 0.9 (0.5) | 1.4 (1.5) | 38 (21)  | 5.3 (4.0)  | 10.9 (7.7)  | 0.9 (0.5) | 1.2 (1.1) |
| TPOAb (maternal)          |          |           |             |           |           |          |            |             |           |           |
| High ( $\geq 9$ IU/mL)    | 13 (5)   | 6.1 (2.5) | 15.3 (7.2)  | 1.0 (0.4) | 1.7 (1.1) | 15 (8)   | 6.1 (2.5)  | 15.3 (7.2)  | 1.0 (0.4) | 1.7 (1.6) |
| Normal (<9 IU/mL)         | 122 (48) | 5.4 (4.7) | 14.5 (8.7)  | 0.9 (0.5) | 1.6 (1.6) | 169 (91) | 5.5 (4.6)  | 13.8 (8.9)  | 0.9 (0.5) | 1.5 (1.5) |
| Missing                   | 121 (47) | 5.7 (3.3) | 13.4 (8.1)  | 0.9 (0.6) | 1.4 (1.4) | 1 (1)    | 10.1 (0.0) | 22.8 (0.0)  | 0.9 (0.0) | 3.3 (0.0) |
| TgAb (maternal)           |          |           |             |           |           |          |            |             |           |           |
| Detectable                | 53 (21)  | 5.5 (3.3) | 14.8 (7.1)  | 0.9 (0.5) | 1.5 (2.1) | 69 (37)  | 5.3 (3.8)  | 14.6 (7.9)  | 0.8 (0.5) | 1.4 (2.0) |
| Not detectable            | 82 (32)  | 5.3 (5.2) | 14.5 (10.4) | 0.9 (0.5) | 1.7 (1.5) | 115 (62) | 5.6 (4.6)  | 14.0 (9.7)  | 0.9 (0.5) | 1.7 (1.4) |
| Missing                   | 121 (47) | 5.7 (3.3) | 13.4 (8.1)  | 0.9 (0.6) | 1.4 (1.4) | 1 (1)    | 10.1 (0.0) | 22.8 (0.0)  | 0.9 (0.0) | 3.3 (0.0) |
| Iodine Status             |          |           |             |           |           |          |            |             |           |           |
| Normal ( $\geq 100$ ug/L) | 139 (54) | 5.6 (4.4) | 14.8 (10.4) | 1.0 (0.6) | 1.6 (1.4) | 109 (59) | 5.5 (4.5)  | 15.1 (10.3) | 0.9 (0.5) | 1.6 (1.3) |
| Low (<100 ug/L)           | 57 (22)  | 6.2 (3.5) | 13.2 (6.6)  | 0.9 (0.5) | 1.6 (2.0) | 38 (21)  | 7.1 (4.3)  | 14.5 (7.8)  | 1.0 (0.4) | 2.1 (2.2) |
| Missing                   | 60 (23)  | 5.4 (3.9) | 13.7 (7.3)  | 0.9 (0.5) | 1.4 (1.5) | 38 (21)  | 5.3 (4.0)  | 10.9 (7.7)  | 0.9 (0.5) | 1.2 (1.1) |

**Table S2:** Baseline characteristics by gestational age of PFAS measurement among mother-infant dyads with at least one thyroid hormone measured ( $n = 305$ ).

|                                                           | 16 Weeks                      | 26 Weeks                      | Delivery                     |
|-----------------------------------------------------------|-------------------------------|-------------------------------|------------------------------|
| <i>n</i>                                                  | 258                           | 32                            | 15                           |
| <b>Gestational Age of PFAS Measurement (median [IQR])</b> | 15.86 [14.71, 17.54]          | 26.79 [25.00, 27.50]          | 39.00 [38.43, 39.79]         |
| <b>PFOA (median [IQR])</b>                                | 5.80 [4.00, 8.05]             | 5.00 [3.77, 7.92]             | 4.90 [3.65, 6.30]            |
| <b>PFOS (median [IQR])</b>                                | 14.25 [10.03, 18.28]          | 14.20 [10.07, 19.27]          | 9.00 [8.05, 12.50]           |
| <b>PFNA (median [IQR])</b>                                | 1.00 [0.70, 1.20]             | 0.70 [0.60, 0.90]             | 0.70 [0.60, 0.85]            |
| <b>PFHxS (median [IQR])</b>                               | 1.60 [0.90, 2.40]             | 1.50 [0.90, 2.02]             | 0.90 [0.80, 1.35]            |
| <b>Race/Ethnicity (%)</b>                                 |                               |                               |                              |
| White and non-Hispanic                                    | 162 (62.8)                    | 23 (71.9)                     | 6 (40.0)                     |
| Other                                                     | 94 (36.4)                     | 9 (28.1)                      | 9 (60.0)                     |
| Missing                                                   | 2 (0.8)                       | 0 (0.0)                       | 0 (0.0)                      |
| <b>Marital Status (%)</b>                                 |                               |                               |                              |
| Married                                                   | 181 (70.2)                    | 23 (71.9)                     | 4 (26.7)                     |
| Not married, but living with someone                      | 27 (10.5)                     | 4 (12.5)                      | 3 (20.0)                     |
| Not married, living alone                                 | 48 (18.6)                     | 5 (15.6)                      | 8 (53.3)                     |
| Missing                                                   | 2 (0.8)                       | 0 (0.0)                       | 0 (0.0)                      |
| <b>Educational Status (%)</b>                             |                               |                               |                              |
| Less than Bachelor's                                      | 121 (46.9)                    | 14 (43.8)                     | 12 (80.0)                    |
| Equal to or higher than a Bachelors                       | 135 (52.3)                    | 18 (56.2)                     | 3 (20.0)                     |
| Missing                                                   | 2 (0.8)                       | 0 (0.0)                       | 0 (0.0)                      |
| <b>Gender</b>                                             |                               |                               |                              |
| Female                                                    | 137 (53.1)                    | 19 (59.4)                     | 7 (46.7)                     |
| Male                                                      | 121 (46.9)                    | 13 (40.6)                     | 8 (53.3)                     |
| <b>Delivery Mode</b>                                      |                               |                               |                              |
| C-section                                                 | 74 (28.7)                     | 10 (31.2)                     | 4 (26.7)                     |
| Vaginal                                                   | 181 (70.2)                    | 22 (68.8)                     | 11 (73.3)                    |
| Missing                                                   | 3 (1.2)                       | 0 (0.0)                       | 0 (0.0)                      |
| <b>Alcohol Usage During Pregnancy</b>                     |                               |                               |                              |
| Never                                                     | 152 (58.9)                    | 12 (37.5)                     | 9 (60.0)                     |
| Ever                                                      | 98 (38.0)                     | 20 (62.5)                     | 5 (33.3)                     |
| Missing                                                   | 8 (3.1)                       | 0 (0.0)                       | 1 (6.7)                      |
| <b>Nulliparous</b>                                        |                               |                               |                              |
| No                                                        | 140 (54.3)                    | 15 (46.9)                     | 12 (80.0)                    |
| Yes                                                       | 111 (43.0)                    | 17 (53.1)                     | 3 (20.0)                     |
| Missing                                                   | 7 (2.7)                       | 0 (0.0)                       | 0 (0.0)                      |
| <b>Maternal Age at Delivery (median [IQR])</b>            | 30.18 [25.69, 33.44]          | 29.79 [25.79, 32.21]          | 25.38 [23.45, 29.17]         |
| <b>Household Income (median [IQR]) in \$/year</b>         | 55000.00 [27500.00, 85000.00] | 65000.00 [21250.00, 85000.00] | 17500.00 [7500.00, 35000.00] |
| <b>Serum Cotinine (median [IQR]) in ng/mL</b>             | -1.58 [-2.23, -0.61]          | -1.88 [-2.44, -1.47]          | -0.29 [-1.03, 0.91]          |
| <b>Maternal BMI (median [IQR]) in kg/m2</b>               | 24.86 [21.82, 29.25]          | 23.00 [21.06, 26.25]          | 23.87 [22.09, 29.46]         |

**Table S3:** Association between PFAS concentrations and thyroid hormones measured in maternal and cord sera across multivariable models.

| Outcome                             | PFAS                     | Cord Serum     |                      |                                |                      |                                                                                                                      |                      | Maternal Serum |                     |                                |                     |                                                                                                                      |                     |
|-------------------------------------|--------------------------|----------------|----------------------|--------------------------------|----------------------|----------------------------------------------------------------------------------------------------------------------|----------------------|----------------|---------------------|--------------------------------|---------------------|----------------------------------------------------------------------------------------------------------------------|---------------------|
|                                     |                          | Model 1: Crude |                      | Model 2: Adjusted <sup>1</sup> |                      | Model 3: Adjusted <sup>1</sup> +<br>log <sub>2</sub> (PCB-153), log <sub>2</sub> (BDE-47), log <sub>2</sub> (BDE-28) |                      | Model 1: Crude |                     | Model 2: Adjusted <sup>1</sup> |                     | Model 3: Adjusted <sup>1</sup> +<br>log <sub>2</sub> (PCB-153), log <sub>2</sub> (BDE-47), log <sub>2</sub> (BDE-28) |                     |
|                                     |                          | <i>n</i>       | $\beta$ (95% CI)     | <i>n</i>                       | $\beta$ (95% CI)     | <i>n</i>                                                                                                             | $\beta$ (95% CI)     | <i>n</i>       | $\beta$ (95% CI)    | <i>n</i>                       | $\beta$ (95% CI)    | <i>n</i>                                                                                                             | $\beta$ (95% CI)    |
| log <sub>2</sub> (TSH)              | log <sub>2</sub> (PFOA)  | 236            | 0.07 (-0.07, 0.21)   | 236                            | 0.06 (-0.08, 0.19)   | 202                                                                                                                  | -0.01 (-0.15, 0.14)  | 171            | 0.08 (-0.13, 0.29)  | 171                            | 0.09 (-0.14, 0.33)  | 142                                                                                                                  | 0.17 (-0.11, 0.45)  |
|                                     | log <sub>2</sub> (PFOS)  | 236            | 0.14 (-0.01, 0.29)   | 236                            | 0.09 (-0.06, 0.25)   | 202                                                                                                                  | 0.04 (-0.13, 0.21)   | 171            | 0.07 (-0.16, 0.30)  | 171                            | 0.02 (-0.24, 0.28)  | 142                                                                                                                  | 0.16 (-0.17, 0.49)  |
|                                     | log <sub>2</sub> (PFNA)  | 236            | 0.08 (-0.11, 0.27)   | 236                            | 0.04 (-0.16, 0.24)   | 202                                                                                                                  | 0.04 (-0.18, 0.26)   | 171            | -0.16 (-0.46, 0.14) | 171                            | -0.23 (-0.56, 0.10) | 142                                                                                                                  | -0.13 (-0.54, 0.28) |
|                                     | log <sub>2</sub> (PFHxS) | 236            | 0.10 (0.00, 0.20)    | 236                            | 0.05 (-0.05, 0.16)   | 202                                                                                                                  | 0.01 (-0.10, 0.13)   | 171            | -0.02 (-0.17, 0.13) | 171                            | -0.06 (-0.23, 0.11) | 142                                                                                                                  | -0.08 (-0.29, 0.12) |
| log <sub>2</sub> (TT <sub>4</sub> ) | log <sub>2</sub> (PFOA)  | 231            | 0.02 (-0.03, 0.07)   | 231                            | 0.03 (-0.02, 0.08)   | 198                                                                                                                  | 0.02 (-0.03, 0.07)   | 171            | -0.04 (-0.11, 0.02) | 171                            | -0.03 (-0.10, 0.04) | 142                                                                                                                  | -0.02 (-0.10, 0.06) |
|                                     | log <sub>2</sub> (PFOS)  | 231            | 0.01 (-0.04, 0.06)   | 231                            | 0.01 (-0.04, 0.07)   | 198                                                                                                                  | 0.03 (-0.03, 0.09)   | 171            | -0.01 (-0.08, 0.06) | 171                            | 0.002 (-0.08, 0.08) | 142                                                                                                                  | 0.02 (-0.08, 0.12)  |
|                                     | log <sub>2</sub> (PFNA)  | 231            | -0.004 (-0.07, 0.06) | 231                            | 0.002 (-0.07, 0.07)  | 198                                                                                                                  | 0.04 (-0.04, 0.11)   | 171            | -0.08 (-0.17, 0.02) | 171                            | -0.07 (-0.17, 0.03) | 142                                                                                                                  | -0.05 (-0.18, 0.07) |
|                                     | log <sub>2</sub> (PFHxS) | 231            | 0.02 (-0.02, 0.05)   | 231                            | 0.02 (-0.01, 0.06)   | 198                                                                                                                  | 0.04 (-0.00, 0.08)   | 171            | -0.02 (-0.07, 0.03) | 171                            | 0.003 (-0.05, 0.06) | 142                                                                                                                  | 0.02 (-0.04, 0.08)  |
| log <sub>2</sub> (TT <sub>3</sub> ) | log <sub>2</sub> (PFOA)  | 236            | -0.02 (-0.09, 0.05)  | 236                            | -0.01 (-0.09, 0.06)  | 202                                                                                                                  | -0.01 (-0.09, 0.07)  | 171            | -0.01 (-0.05, 0.03) | 171                            | -0.01 (-0.05, 0.04) | 142                                                                                                                  | -0.01 (-0.06, 0.04) |
|                                     | log <sub>2</sub> (PFOS)  | 236            | -0.01 (-0.09, 0.06)  | 236                            | -0.02 (-0.10, 0.06)  | 202                                                                                                                  | -0.02 (-0.12, 0.07)  | 171            | -0.04 (-0.08, 0.01) | 171                            | -0.02 (-0.07, 0.03) | 142                                                                                                                  | -0.02 (-0.08, 0.04) |
|                                     | log <sub>2</sub> (PFNA)  | 236            | -0.03 (-0.13, 0.07)  | 236                            | -0.04 (-0.14, 0.07)  | 202                                                                                                                  | -0.03 (-0.15, 0.09)  | 171            | -0.05 (-0.11, 0.01) | 171                            | -0.03 (-0.09, 0.03) | 142                                                                                                                  | -0.02 (-0.09, 0.05) |
|                                     | log <sub>2</sub> (PFHxS) | 236            | -0.01 (-0.06, 0.04)  | 236                            | -0.02 (-0.08, 0.03)  | 202                                                                                                                  | -0.02 (-0.08, 0.05)  | 171            | -0.02 (-0.05, 0.00) | 171                            | -0.01 (-0.04, 0.02) | 142                                                                                                                  | -0.01 (-0.05, 0.02) |
| log <sub>2</sub> (FT <sub>4</sub> ) | log <sub>2</sub> (PFOA)  | 236            | -0.004 (-0.04, 0.03) | 236                            | -0.005 (-0.04, 0.03) | 202                                                                                                                  | -0.01 (-0.05, 0.03)  | 171            | -0.01 (-0.05, 0.03) | 171                            | -0.01 (-0.06, 0.03) | 142                                                                                                                  | -0.01 (-0.06, 0.03) |
|                                     | log <sub>2</sub> (PFOS)  | 236            | -0.02 (-0.06, 0.02)  | 236                            | -0.02 (-0.06, 0.02)  | 202                                                                                                                  | -0.002 (-0.05, 0.04) | 171            | 0.03 (-0.01, 0.07)  | 171                            | 0.02 (-0.02, 0.07)  | 142                                                                                                                  | 0.02 (-0.03, 0.08)  |
|                                     | log <sub>2</sub> (PFNA)  | 236            | -0.004 (-0.06, 0.05) | 236                            | -0.01 (-0.07, 0.04)  | 202                                                                                                                  | 0.01 (-0.05, 0.07)   | 171            | -0.01 (-0.07, 0.05) | 171                            | -0.01 (-0.07, 0.05) | 142                                                                                                                  | 0.01 (-0.05, 0.08)  |
|                                     | log <sub>2</sub> (PFHxS) | 236            | -0.001 (-0.03, 0.03) | 236                            | -0.01 (-0.04, 0.02)  | 202                                                                                                                  | -0.001 (-0.03, 0.03) | 171            | 0.01 (-0.01, 0.04)  | 171                            | 0.02 (-0.01, 0.05)  | 142                                                                                                                  | 0.03 (-0.01, 0.06)  |
| log <sub>2</sub> (FT <sub>3</sub> ) | log <sub>2</sub> (PFOA)  | 234            | -0.02 (-0.06, 0.03)  | 234                            | -0.01 (-0.06, 0.03)  | 200                                                                                                                  | -0.01 (-0.05, 0.04)  | 171            | -0.01 (-0.03, 0.02) | 171                            | -0.01 (-0.04, 0.01) | 142                                                                                                                  | -0.01 (-0.03, 0.02) |
|                                     | log <sub>2</sub> (PFOS)  | 234            | -0.02 (-0.07, 0.02)  | 234                            | -0.03 (-0.07, 0.02)  | 200                                                                                                                  | -0.03 (-0.09, 0.02)  | 171            | -0.03 (-0.05, 0.00) | 171                            | -0.03 (-0.06, 0.00) | 142                                                                                                                  | -0.02 (-0.05, 0.01) |
|                                     | log <sub>2</sub> (PFNA)  | 234            | -0.01 (-0.07, 0.04)  | 234                            | -0.02 (-0.08, 0.04)  | 200                                                                                                                  | -0.02 (-0.09, 0.05)  | 171            | -0.01 (-0.05, 0.02) | 171                            | -0.02 (-0.05, 0.02) | 142                                                                                                                  | -0.01 (-0.05, 0.03) |
|                                     | log <sub>2</sub> (PFHxS) | 234            | -0.01 (-0.04, 0.02)  | 234                            | -0.02 (-0.05, 0.02)  | 200                                                                                                                  | -0.01 (-0.05, 0.02)  | 171            | -0.02 (-0.03, 0.00) | 171                            | -0.02 (-0.04, 0.00) | 142                                                                                                                  | -0.01 (-0.04, 0.01) |

**Table S4:** Associations between PFAS and thyroid hormones by thyroid antibody levels in multivariable models.

| Thyroid Hormones by Maternal Thyroid Antibody and PFAS | Cord Serum |                             |                                        |                                        | Maternal Serum |                             |                                        |                                        |
|--------------------------------------------------------|------------|-----------------------------|----------------------------------------|----------------------------------------|----------------|-----------------------------|----------------------------------------|----------------------------------------|
|                                                        | <i>n</i>   | Interaction <i>p</i> -value | PFAS with TPOAb ≤ median or TgAb = 0.0 | PFAS with TPOAb > median or TgAb > 0.0 | <i>n</i>       | Interaction <i>p</i> -value | PFAS with TPOAb ≤ median or TgAb = 0.0 | PFAS with TPOAb > median or TgAb > 0.0 |
|                                                        |            |                             | $\beta$ (95% CI)                       | $\beta$ (95% CI)                       |                |                             | $\beta$ (95% CI)                       | $\beta$ (95% CI)                       |
| $\log_2$ (TSH)                                         |            |                             |                                        |                                        |                |                             |                                        |                                        |
| TPOAb x $\log_2$ (PFOA)                                | 126        | 0.24                        | -0.06 (-0.33, 0.21)                    | 0.18 (-0.12, 0.47)                     | 170            | 0.63                        | 0.13 (-0.17, 0.42)                     | 0.02 (-0.34, 0.37)                     |
| TPOAb x $\log_2$ (PFOS)                                | 126        | 0.21                        | 0.06 (-0.25, 0.38)                     | 0.34 (0.01, 0.67)                      | 170            | 0.58                        | -0.06 (-0.41, 0.29)                    | 0.07 (-0.29, 0.44)                     |
| TPOAb x $\log_2$ (PFNA)                                | 126        | 0.91                        | 0.14 (-0.27, 0.56)                     | 0.11 (-0.31, 0.53)                     | 170            | 0.83                        | -0.27 (-0.72, 0.18)                    | -0.20 (-0.66, 0.26)                    |
| TPOAb x $\log_2$ (PFHxS)                               | 126        | 0.92                        | 0.11 (-0.10, 0.33)                     | 0.10 (-0.12, 0.32)                     | 170            | 0.14                        | 0.03 (-0.18, 0.25)                     | -0.20 (-0.44, 0.04)                    |
| TgAb x $\log_2$ (PFOA)                                 | 126        | 0.96                        | 0.05 (-0.19, 0.30)                     | 0.06 (-0.30, 0.42)                     | 170            | 0.65                        | 0.12 (-0.16, 0.40)                     | 0.01 (-0.38, 0.40)                     |
| TgAb x $\log_2$ (PFOS)                                 | 126        | 0.87                        | 0.19 (-0.09, 0.47)                     | 0.23 (-0.19, 0.66)                     | 170            | 0.92                        | -0.002 (-0.31, 0.31)                   | 0.02 (-0.42, 0.46)                     |
| TgAb x $\log_2$ (PFNA)                                 | 126        | 0.66                        | 0.14 (-0.24, 0.52)                     | 0.01 (-0.47, 0.49)                     | 170            | 0.20                        | -0.40 (-0.81, 0.01)                    | 0.03 (-0.50, 0.55)                     |
| TgAb x $\log_2$ (PFHxS)                                | 126        | 0.42                        | 0.15 (-0.04, 0.35)                     | 0.03 (-0.22, 0.27)                     | 170            | 0.66                        | -0.03 (-0.26, 0.19)                    | -0.11 (-0.35, 0.14)                    |
| $\log_2$ (TT <sub>4</sub> )                            |            |                             |                                        |                                        |                |                             |                                        |                                        |
| TPOAb x $\log_2$ (PFOA)                                | 123        | 0.01*                       | 0.11 (0.03, 0.19)                      | -0.04 (-0.12, 0.04)                    | 170            | 0.54                        | -0.01 (-0.10, 0.08)                    | -0.05 (-0.16, 0.05)                    |
| TPOAb x $\log_2$ (PFOS)                                | 123        | 0.38                        | 0.001 (-0.09, 0.10)                    | -0.06 (-0.15, 0.04)                    | 170            | 0.34                        | 0.04 (-0.06, 0.15)                     | -0.03 (-0.14, 0.08)                    |
| TPOAb x $\log_2$ (PFNA)                                | 123        | 0.77                        | -0.02 (-0.15, 0.10)                    | 0.001 (-0.12, 0.12)                    | 170            | 0.82                        | -0.06 (-0.20, 0.07)                    | -0.09 (-0.22, 0.05)                    |
| TPOAb x $\log_2$ (PFHxS)                               | 123        | 0.28                        | 0.002 (-0.06, 0.06)                    | -0.04 (-0.11, 0.02)                    | 170            | 0.94                        | 0.01 (-0.06, 0.07)                     | 0.01 (-0.07, 0.08)                     |
| TgAb x $\log_2$ (PFOA)                                 | 123        | 0.60                        | 0.02 (-0.05, 0.09)                     | 0.05 (-0.05, 0.15)                     | 170            | 0.74                        | -0.03 (-0.11, 0.06)                    | -0.05 (-0.17, 0.07)                    |
| TgAb x $\log_2$ (PFOS)                                 | 123        | 0.61                        | -0.04 (-0.12, 0.04)                    | -0.001 (-0.12, 0.12)                   | 170            | 0.24                        | 0.03 (-0.07, 0.12)                     | -0.07 (-0.20, 0.07)                    |
| TgAb x $\log_2$ (PFNA)                                 | 123        | 0.81                        | -0.01 (-0.12, 0.10)                    | 0.01 (-0.13, 0.15)                     | 170            | 0.49                        | -0.08 (-0.21, 0.04)                    | -0.02 (-0.18, 0.14)                    |
| TgAb x $\log_2$ (PFHxS)                                | 123        | 0.92                        | -0.02 (-0.08, 0.03)                    | -0.02 (-0.09, 0.05)                    | 170            | 0.78                        | -0.005 (-0.07, 0.06)                   | 0.01 (-0.07, 0.08)                     |

\**p*-value < 0.05

Median values for TPOAb ranged between 0.6 and 0.7 IU/mL

These models have been adjusted for maternal age at delivery, race/ethnicity, marital status at baseline, maternal education level, household income, mean  $\log_{10}$ -transformed cotinine, maternal alcohol usage during pregnancy, nulliparity, maternal body mass index based on pre-pregnancy weight in pounds, the child's sex, and gestational week at blood draw for PFAS measurement. Thyroid hormone cord serum models also included delivery mode as a covariate.

**Table S4 (cont.):** Associations between PFAS and thyroid hormones by thyroid antibody levels in multivariable models.

|                                     |     |      |                      |                      |     |       |                       |                      |
|-------------------------------------|-----|------|----------------------|----------------------|-----|-------|-----------------------|----------------------|
| log <sub>2</sub> (TT <sub>3</sub> ) |     |      |                      |                      |     |       |                       |                      |
| TPOAb x log <sub>2</sub> (PFOA)     | 125 | 0.79 | 0.02 (-0.13, 0.16)   | 0.05 (-0.10, 0.20)   | 170 | 0.17  | -0.03 (-0.09, 0.02)   | 0.03 (-0.04, 0.09)   |
| TPOAb x log <sub>2</sub> (PFOS)     | 125 | 0.36 | -0.07 (-0.24, 0.10)  | 0.04 (-0.14, 0.21)   | 170 | 0.14  | -0.05 (-0.12, 0.01)   | 0.01 (-0.05, 0.08)   |
| TPOAb x log <sub>2</sub> (PFNA)     | 125 | 0.15 | -0.17 (-0.37, 0.04)  | 0.05 (-0.17, 0.26)   | 170 | 0.22  | -0.07 (-0.15, 0.02)   | 0.004 (-0.08, 0.09)  |
| TPOAb x log <sub>2</sub> (PFHxS)    | 125 | 0.71 | -0.01 (-0.12, 0.10)  | 0.02 (-0.09, 0.13)   | 170 | 0.09  | -0.03 (-0.07, 0.01)   | 0.01 (-0.03, 0.06)   |
| TgAb x log <sub>2</sub> (PFOA)      | 125 | 0.91 | 0.03 (-0.10, 0.16)   | 0.04 (-0.14, 0.22)   | 170 | 0.73  | -0.01 (-0.06, 0.04)   | -0.02 (-0.09, 0.05)  |
| TgAb x log <sub>2</sub> (PFOS)      | 125 | 0.06 | -0.09 (-0.24, 0.05)  | 0.15 (-0.06, 0.37)   | 170 | 0.74  | -0.02 (-0.08, 0.03)   | -0.04 (-0.12, 0.04)  |
| TgAb x log <sub>2</sub> (PFNA)      | 125 | 0.96 | -0.05 (-0.24, 0.14)  | -0.06 (-0.30, 0.19)  | 170 | 0.32  | -0.04 (-0.12, 0.03)   | 0.01 (-0.08, 0.11)   |
| TgAb x log <sub>2</sub> (PFHxS)     | 125 | 0.30 | -0.02 (-0.12, 0.08)  | 0.06 (-0.07, 0.19)   | 170 | 0.97  | -0.02 (-0.06, 0.02)   | -0.01 (-0.06, 0.03)  |
| log <sub>2</sub> (FT <sub>4</sub> ) |     |      |                      |                      |     |       |                       |                      |
| TPOAb x log <sub>2</sub> (PFOA)     | 126 | 0.12 | 0.02 (-0.06, 0.09)   | -0.07 (-0.14, 0.01)  | 170 | 0.70  | -0.02 (-0.07, 0.04)   | -0.002 (-0.07, 0.06) |
| TPOAb x log <sub>2</sub> (PFOS)     | 126 | 0.09 | 0.01 (-0.08, 0.09)   | -0.09 (-0.18, -0.01) | 170 | 0.80  | 0.03 (-0.03, 0.10)    | 0.02 (-0.04, 0.09)   |
| TPOAb x log <sub>2</sub> (PFNA)     | 126 | 0.81 | 0.01 (-0.10, 0.12)   | -0.01 (-0.12, 0.10)  | 170 | 0.37  | 0.02 (-0.07, 0.10)    | -0.04 (-0.12, 0.05)  |
| TPOAb x log <sub>2</sub> (PFHxS)    | 126 | 0.08 | -0.001 (-0.06, 0.05) | -0.07 (-0.13, -0.01) | 170 | 0.83  | 0.02 (-0.02, 0.06)    | 0.02 (-0.03, 0.06)   |
| TgAb x log <sub>2</sub> (PFOA)      | 126 | 0.33 | -0.04 (-0.10, 0.03)  | 0.02 (-0.08, 0.11)   | 170 | 0.36  | -0.0001 (-0.05, 0.05) | -0.04 (-0.11, 0.03)  |
| TgAb x log <sub>2</sub> (PFOS)      | 126 | 0.77 | -0.05 (-0.12, 0.03)  | -0.03 (-0.14, 0.09)  | 170 | 0.05  | 0.05 (0.00, 0.11)     | -0.04 (-0.12, 0.04)  |
| TgAb x log <sub>2</sub> (PFNA)      | 126 | 0.69 | -0.02 (-0.12, 0.09)  | 0.02 (-0.11, 0.14)   | 170 | 0.10  | 0.03 (-0.04, 0.11)    | -0.07 (-0.16, 0.03)  |
| TgAb x log <sub>2</sub> (PFHxS)     | 126 | 0.84 | -0.04 (-0.09, 0.01)  | -0.03 (-0.09, 0.04)  | 170 | 0.02* | 0.05 (0.01, 0.09)     | -0.02 (-0.06, 0.03)  |

\**p*-value < 0.05

Median values for TPOAb ranged between 0.6 and 0.7 IU/mL

These models have been adjusted for maternal age at delivery, race/ethnicity, marital status at baseline, maternal education level, household income, mean log<sub>10</sub>-transformed cotinine, maternal alcohol usage during pregnancy, nulliparity, maternal body mass index based on pre-pregnancy weight in pounds, the child's sex, and gestational week at blood draw for PFAS measurement. Thyroid hormone cord serum models also included delivery mode as a covariate.



**Table S4 (cont.):** Associations between PFAS and thyroid hormones by thyroid antibody levels in multivariable models.

| $\log_2(\text{FT}_3)$          |     |       |                     |                      |     |      |                     |                      |
|--------------------------------|-----|-------|---------------------|----------------------|-----|------|---------------------|----------------------|
| TPOAb x $\log_2(\text{PFOA})$  | 124 | 0.35  | -0.02 (-0.11, 0.06) | 0.03 (-0.05, 0.12)   | 170 | 0.18 | -0.03 (-0.06, 0.00) | 0.004 (-0.03, 0.04)  |
| TPOAb x $\log_2(\text{PFOS})$  | 124 | 0.34  | -0.06 (-0.15, 0.04) | 0.004 (-0.09, 0.10)  | 170 | 0.52 | -0.04 (-0.08, 0.00) | -0.02 (-0.06, 0.02)  |
| TPOAb x $\log_2(\text{PFNA})$  | 124 | 0.23  | -0.10 (-0.22, 0.01) | -0.003 (-0.12, 0.12) | 170 | 0.64 | -0.03 (-0.08, 0.02) | -0.01 (-0.06, 0.04)  |
| TPOAb x $\log_2(\text{PFHxS})$ | 124 | 0.78  | -0.01 (-0.08, 0.05) | -0.001 (-0.06, 0.06) | 170 | 0.47 | -0.02 (-0.05, 0.00) | -0.01 (-0.04, 0.02)  |
| TgAb x $\log_2(\text{PFOA})$   | 124 | 0.44  | -0.01 (-0.09, 0.06) | 0.04 (-0.07, 0.14)   | 170 | 0.35 | -0.01 (-0.04, 0.02) | -0.03 (-0.08, 0.01)  |
| TgAb x $\log_2(\text{PFOS})$   | 124 | 0.02* | -0.08 (-0.16, 0.00) | 0.09 (-0.03, 0.21)   | 170 | 0.12 | -0.02 (-0.05, 0.02) | -0.06 (-0.11, -0.01) |
| TgAb x $\log_2(\text{PFNA})$   | 124 | 0.57  | -0.06 (-0.17, 0.05) | -0.01 (-0.15, 0.13)  | 170 | 0.12 | -0.04 (-0.08, 0.01) | 0.02 (-0.04, 0.08)   |
| TgAb x $\log_2(\text{PFHxS})$  | 124 | 0.10  | -0.04 (-0.09, 0.02) | 0.04 (-0.03, 0.11)   | 170 | 0.55 | -0.01 (-0.04, 0.01) | -0.02 (-0.05, 0.00)  |

\* $p$ -value < 0.05

Median values for TPOAb ranged between 0.6 and 0.7 IU/mL

These models have been adjusted for maternal age at delivery, race/ethnicity, marital status at baseline, maternal education level, household income, mean  $\log_{10}$ -transformed cotinine, maternal alcohol usage during pregnancy, nulliparity, maternal body mass index based on pre-pregnancy weight in pounds, the child's sex, and gestational week at blood draw for PFAS measurement. Thyroid hormone cord serum models also included delivery mode as a covariate.

**Table S5:** Associations between PFAS and thyroid hormones by iodine deficiency status.

| Thyroid Hormones by iodine deficiency and PFAS | Cord Serum |                             |                                                                   |                                                               | Maternal Serum |                             |                                                                |                                                            |
|------------------------------------------------|------------|-----------------------------|-------------------------------------------------------------------|---------------------------------------------------------------|----------------|-----------------------------|----------------------------------------------------------------|------------------------------------------------------------|
|                                                | <i>n</i>   | Interaction <i>p</i> -value | PFAS with Iodine $\geq 150\mu\text{g I/g Cr}$<br>$\beta$ (95% CI) | PFAS with Iodine $<150\mu\text{g I/g Cr}$<br>$\beta$ (95% CI) | <i>n</i>       | Interaction <i>p</i> -value | PFAS with Iodine $\geq 150\mu\text{g I/g}$<br>$\beta$ (95% CI) | PFAS with Iodine $<150\mu\text{g I/g}$<br>$\beta$ (95% CI) |
| $\log_2(\text{TSH})$                           |            |                             |                                                                   |                                                               |                |                             |                                                                |                                                            |
| IDS x $\log_2(\text{PFOA})$                    | 180        | 0.12                        | 0.17 (-0.02, 0.37)                                                | -0.15 (-0.50, 0.21)                                           | 135            | 0.51                        | 0.14 (-0.19, 0.46)                                             | -0.08 (-0.67, 0.50)                                        |
| IDS x $\log_2(\text{PFOS})$                    | 180        | 0.39                        | 0.22 (0.01, 0.43)                                                 | 0.01 (-0.42, 0.44)                                            | 135            | 0.26                        | -0.07 (-0.44, 0.30)                                            | -0.45 (-1.02, 0.12)                                        |
| IDS x $\log_2(\text{PFNA})$                    | 180        | 0.55                        | 0.17 (-0.10, 0.44)                                                | 0.02 (-0.41, 0.45)                                            | 135            | 0.80                        | -0.28 (-0.74, 0.19)                                            | -0.38 (-1.09, 0.33)                                        |
| IDS x $\log_2(\text{PFHxS})$                   | 180        | 0.11                        | 0.21 (0.06, 0.36)                                                 | -0.01 (-0.23, 0.21)                                           | 135            | 0.60                        | -0.10 (-0.33, 0.13)                                            | 0.01 (-0.33, 0.34)                                         |
| $\log_2(\text{TT}_4)$                          |            |                             |                                                                   |                                                               |                |                             |                                                                |                                                            |
| IDS x $\log_2(\text{PFOA})$                    | 176        | 0.18                        | 0.03 (-0.03, 0.10)                                                | -0.06 (-0.17, 0.06)                                           | 135            | 0.93                        | -0.04 (-0.14, 0.06)                                            | -0.03 (-0.22, 0.15)                                        |
| IDS x $\log_2(\text{PFOS})$                    | 176        | 0.36                        | -0.01 (-0.08, 0.06)                                               | -0.08 (-0.22, 0.06)                                           | 135            | 0.24                        | -0.02 (-0.14, 0.10)                                            | 0.10 (-0.08, 0.28)                                         |
| IDS x $\log_2(\text{PFNA})$                    | 176        | 0.23                        | 0.03 (-0.06, 0.11)                                                | -0.07 (-0.21, 0.07)                                           | 135            | 0.90                        | -0.04 (-0.19, 0.10)                                            | -0.06 (-0.29, 0.16)                                        |
| IDS x $\log_2(\text{PFHxS})$                   | 176        | 0.03*                       | 0.03 (-0.02, 0.07)                                                | -0.08 (-0.15, 0.00)                                           | 135            | 0.40                        | 0.02 (-0.05, 0.10)                                             | -0.03 (-0.14, 0.07)                                        |
| $\log_2(\text{TT}_3)$                          |            |                             |                                                                   |                                                               |                |                             |                                                                |                                                            |
| IDS x $\log_2(\text{PFOA})$                    | 180        | 0.27                        | 0.02 (-0.08, 0.13)                                                | -0.10 (-0.28, 0.09)                                           | 135            | 0.83                        | -0.00 (-0.06, 0.05)                                            | 0.01 (-0.10, 0.11)                                         |
| IDS x $\log_2(\text{PFOS})$                    | 180        | 0.71                        | 0.01 (-0.11, 0.12)                                                | -0.04 (-0.27, 0.18)                                           | 135            | 0.92                        | -0.01 (-0.08, 0.06)                                            | -0.00 (-0.11, 0.10)                                        |
| IDS x $\log_2(\text{PFNA})$                    | 180        | 0.38                        | 0.02 (-0.11, 0.16)                                                | -0.09 (-0.31, 0.13)                                           | 135            | 0.58                        | -0.02 (-0.11, 0.06)                                            | 0.02 (-0.11, 0.15)                                         |
| IDS x $\log_2(\text{PFHxS})$                   | 180        | 0.03*                       | 0.03 (-0.05, 0.11)                                                | -0.12 (-0.24, 0.01)                                           | 135            | 0.74                        | -0.01 (-0.05, 0.03)                                            | -0.00 (-0.06, 0.06)                                        |
| $\log_2(\text{FT}_4)$                          |            |                             |                                                                   |                                                               |                |                             |                                                                |                                                            |
| IDS x $\log_2(\text{PFOA})$                    | 181        | 0.81                        | -0.01 (-0.06, 0.05)                                               | 0.01 (-0.09, 0.11)                                            | 135            | 0.68                        | -0.02 (-0.08, 0.03)                                            | -0.00 (-0.10, 0.10)                                        |
| IDS x $\log_2(\text{PFOS})$                    | 181        | 0.56                        | -0.04 (-0.10, 0.03)                                               | -0.08 (-0.20, 0.05)                                           | 135            | 0.96                        | 0.01 (-0.05, 0.08)                                             | 0.01 (-0.09, 0.11)                                         |
| IDS x $\log_2(\text{PFNA})$                    | 181        | 0.87                        | -0.01 (-0.09, 0.06)                                               | -0.00 (-0.13, 0.12)                                           | 135            | 0.73                        | -0.01 (-0.09, 0.07)                                            | 0.02 (-0.10, 0.14)                                         |
| IDS x $\log_2(\text{PFHxS})$                   | 181        | 0.08                        | 0.01 (-0.04, 0.05)                                                | -0.06 (-0.13, 0.00)                                           | 135            | 0.53                        | 0.02 (-0.02, 0.06)                                             | -0.00 (-0.06, 0.05)                                        |
| $\log_2(\text{FT}_3)$                          |            |                             |                                                                   |                                                               |                |                             |                                                                |                                                            |
| IDS x $\log_2(\text{PFOA})$                    | 179        | 0.54                        | 0.01 (-0.05, 0.06)                                                | -0.03 (-0.13, 0.07)                                           | 135            | 0.17                        | -0.01 (-0.04, 0.02)                                            | -0.06 (-0.12, 0.00)                                        |
| IDS x $\log_2(\text{PFOS})$                    | 179        | 0.15                        | -0.01 (-0.07, 0.05)                                               | -0.11 (-0.24, 0.01)                                           | 135            | 0.14                        | -0.02 (-0.06, 0.01)                                            | -0.07 (-0.13, 0.02)                                        |
| IDS x $\log_2(\text{PFNA})$                    | 179        | 0.25                        | 0.04 (-0.04, 0.12)                                                | -0.04 (-0.17, 0.08)                                           | 135            | 0.72                        | -0.01 (-0.06, 0.04)                                            | 0.00 (-0.07, 0.08)                                         |
| IDS x $\log_2(\text{PFHxS})$                   | 179        | 0.001*                      | 0.02 (-0.02, 0.06)                                                | -0.11 (-0.17, 0.05)                                           | 135            | 0.33                        | -0.01 (-0.03, 0.01)                                            | -0.03 (-0.07, 0.00)                                        |

\**p*-value < 0.05

Cr= creatinine, IDS = Iodine deficiency status

These models have been adjusted for maternal age at delivery, race/ethnicity, marital status at baseline, maternal education level, household income, mean  $\log_{10}$ -transformed cotinine, maternal alcohol usage during pregnancy, nulliparity, maternal body mass index based on pre-pregnancy weight in pounds, the child's sex, and gestational week at blood draw for PFAS measurement. Thyroid hormone cord serum models also included delivery mode as a covariate.

**Figure S1:** Flow chart of study participants in the HOME Study by available PFAS, thyroid, and covariate exposures.

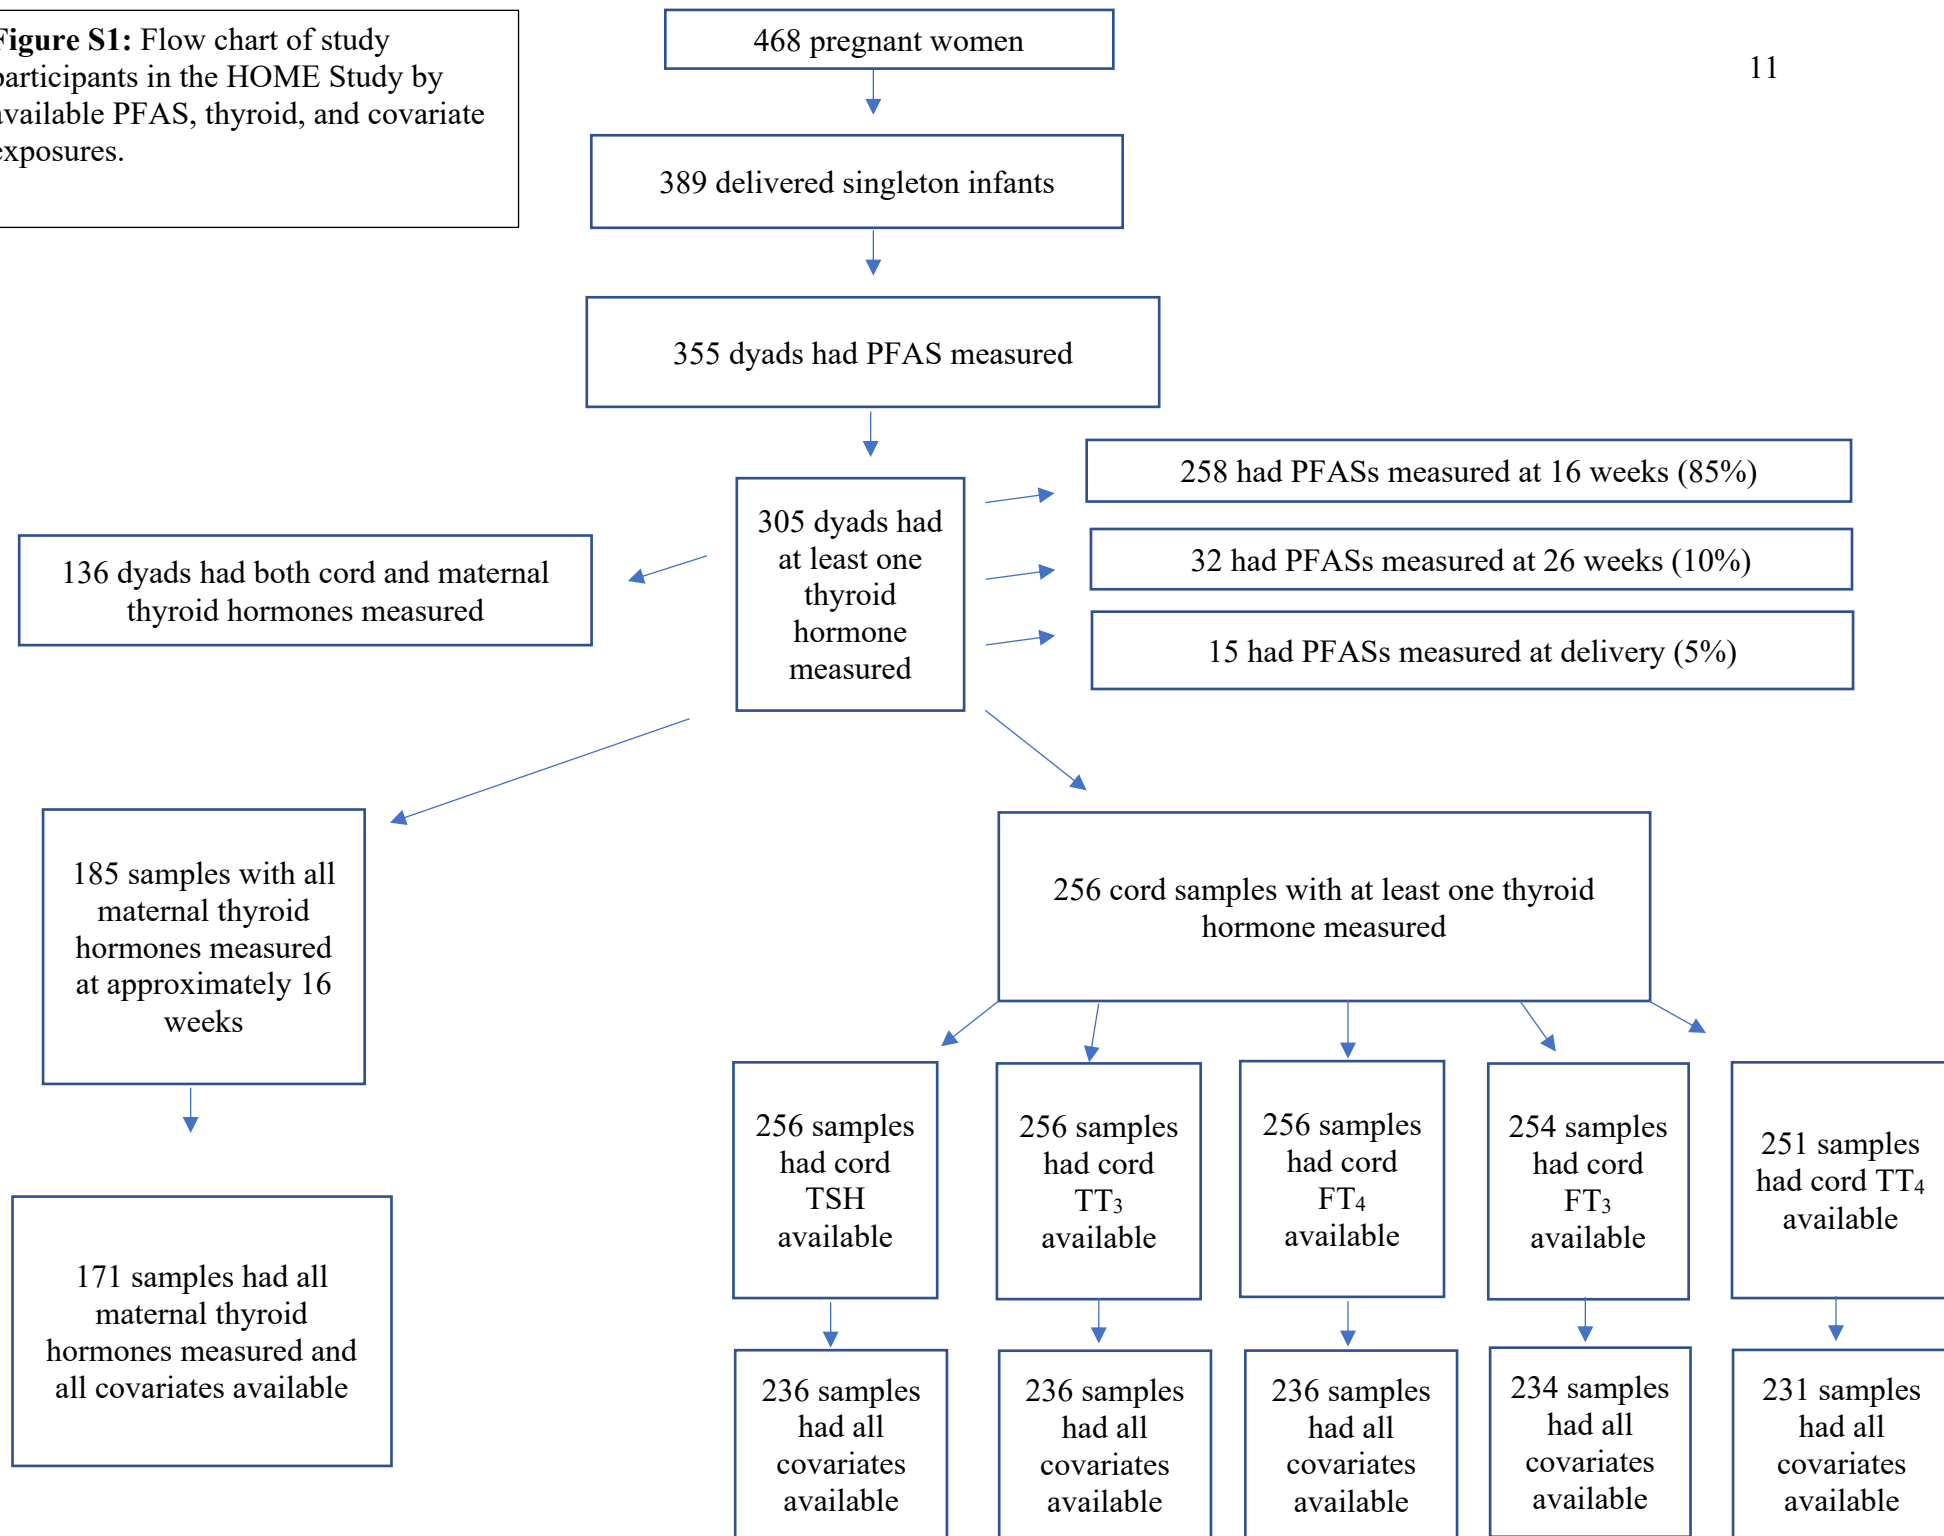

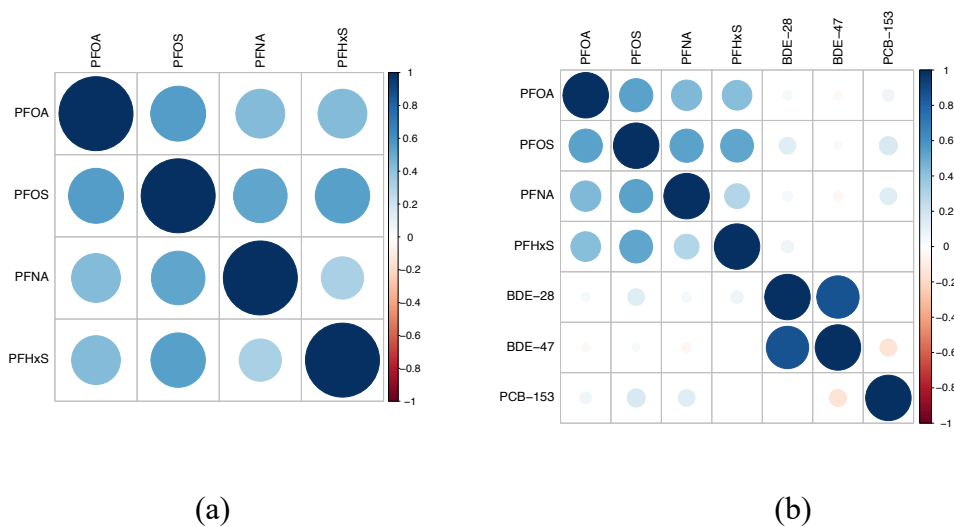

**Figure S2:** Correlation between PFAS, BDE-28, BDE-47, and PCB-153. (a) The plot compares the Spearman correlation between chemicals among the 305 samples with PFAS and at least one thyroid hormone measured ( $n = 305$ ). (b) The plot compares the Spearman correlation between chemicals among the samples with all PFAS, BDE-28, BDE-47, and PCB-153, and at least one thyroid hormone measure ( $n = 262$ ).

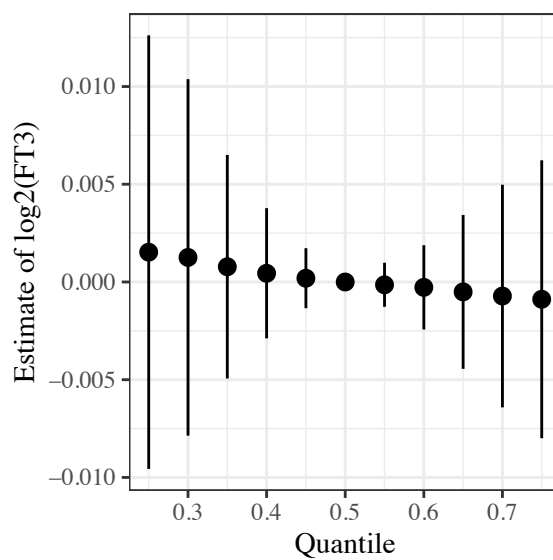

**Figure S3:** Adjusted association of the overall PFAS mixture on log<sub>2</sub>-transformed cord FT<sub>3</sub> from BKMR analysis ( $n = 171$ ). The plot compares the value of the estimate when all the log<sub>2</sub>-transformed PFAS are at the respective quantile compared to when they are at the median. Variation is expressed using 95% credible intervals. The model has been adjusted for maternal age at delivery, race/ethnicity, marital status at baseline, maternal education level, household income, mean log<sub>10</sub>-transformed cotinine, maternal alcohol usage during pregnancy, nulliparity, maternal body mass index based on pre-pregnancy weight in pounds, the child's sex, and gestational week at blood draw for PFAS measurement. All predictors and continuous covariates were also centered to 0 and scaled to a standard deviation of 1.

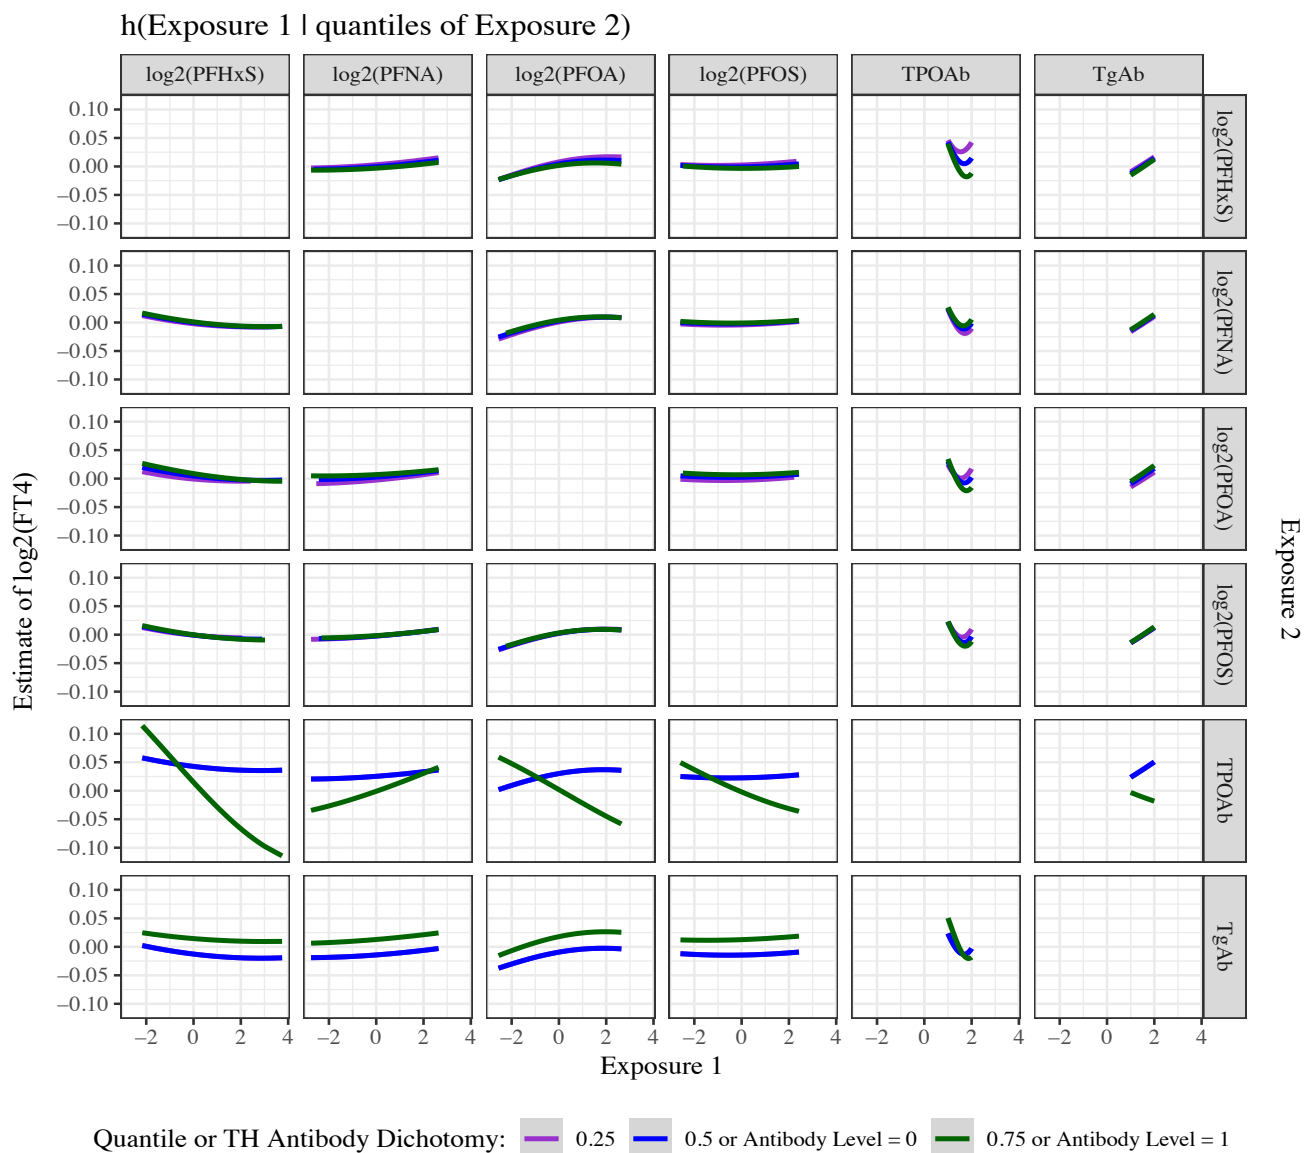

TH = thyroid hormone

**Figure S4:** Interactions between exposures within the  $\log_2$ -transformed cord serum FT<sub>4</sub> BKMR model ( $n = 236$ ). The plot demonstrates the outcome estimate ( $y$ -axis) given different quartiles of exposure 2 (right-hand side) on values of exposure 1 ( $x$ -axis). The purple, royal blue, and dark green lines indicate the 25<sup>th</sup>, 50<sup>th</sup>, and 75<sup>th</sup> percentile of exposure 2 respectively. Alternatively, the royal blue line represents the less than or equal to the median value for TPOAb and no detection for TgAb and the dark green line represents greater than the median for TPOAb and detection for TgAb. The model has been adjusted for maternal age at delivery, race/ethnicity, marital status at baseline, maternal education level, household income, mean  $\log_{10}$ -transformed cotinine, maternal alcohol usage during pregnancy, nulliparity, maternal body mass index based on pre-pregnancy weight in pounds, the child's sex, gestational week at blood draw for PFAS measurement, and delivery mode. All predictors and continuous covariates were also centered to 0 and scaled to a standard deviation of 1.

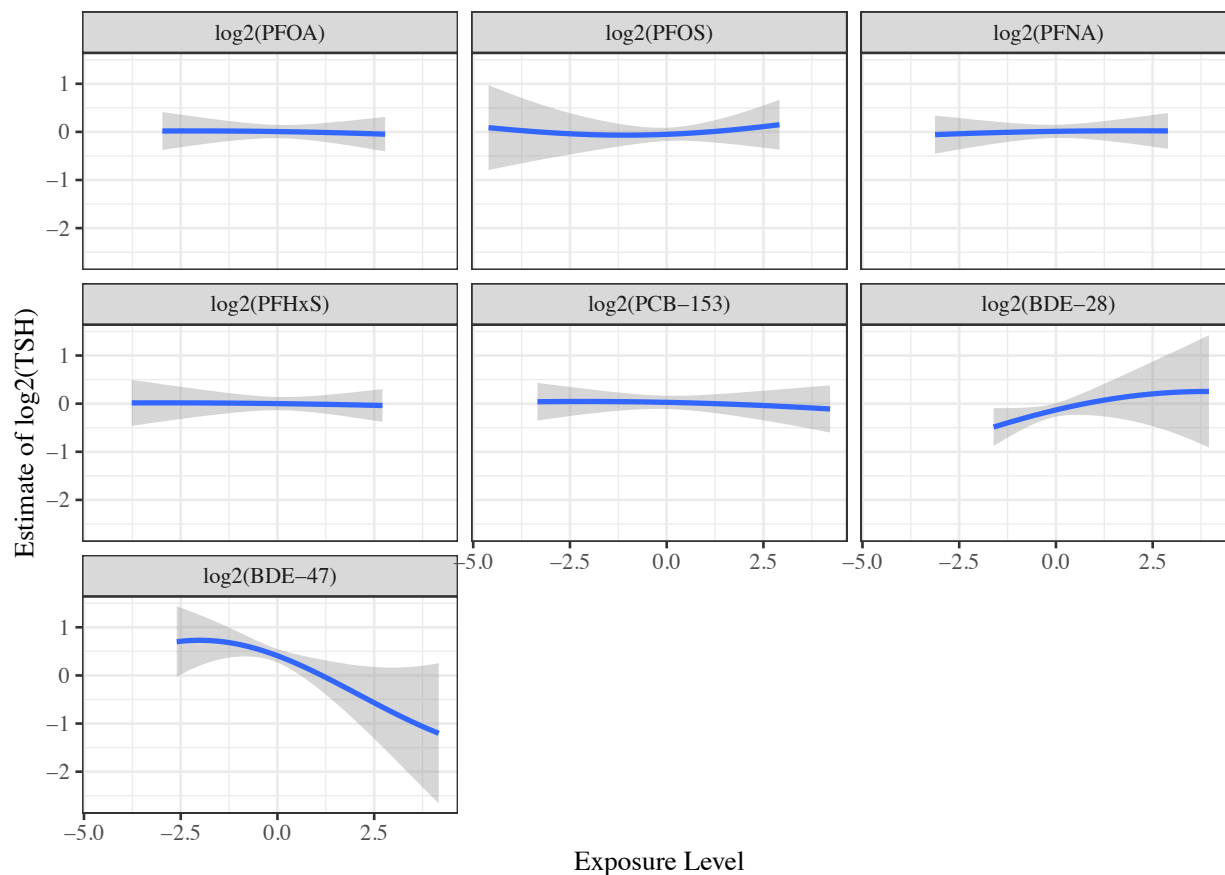

**Figure S5:** Adjusted associations of  $\log_2$ -transformed PFAS, BDE-28, BDE-47, and PCB-153 as exposures on  $\log_2$ -transformed cord serum TSH using BKMR ( $n = 202$ ). The plot assesses the association between each exposure and the estimate of  $\log_2$ -transformed TSH while fixing the other exposures to their 50<sup>th</sup> percentile. 95% CrI are shown in grey to depict variability. The models have been adjusted for maternal age at delivery, race/ethnicity, marital status at baseline, maternal education level, household income, mean  $\log_{10}$ -transformed cotinine, maternal alcohol usage during pregnancy, nulliparity, maternal body mass index based on pre-pregnancy weight in pounds, the child's sex, gestational week at blood draw for PFAS measurement, and delivery mode. All predictors and continuous covariates were also centered to 0 and scaled to a standard deviation of 1.

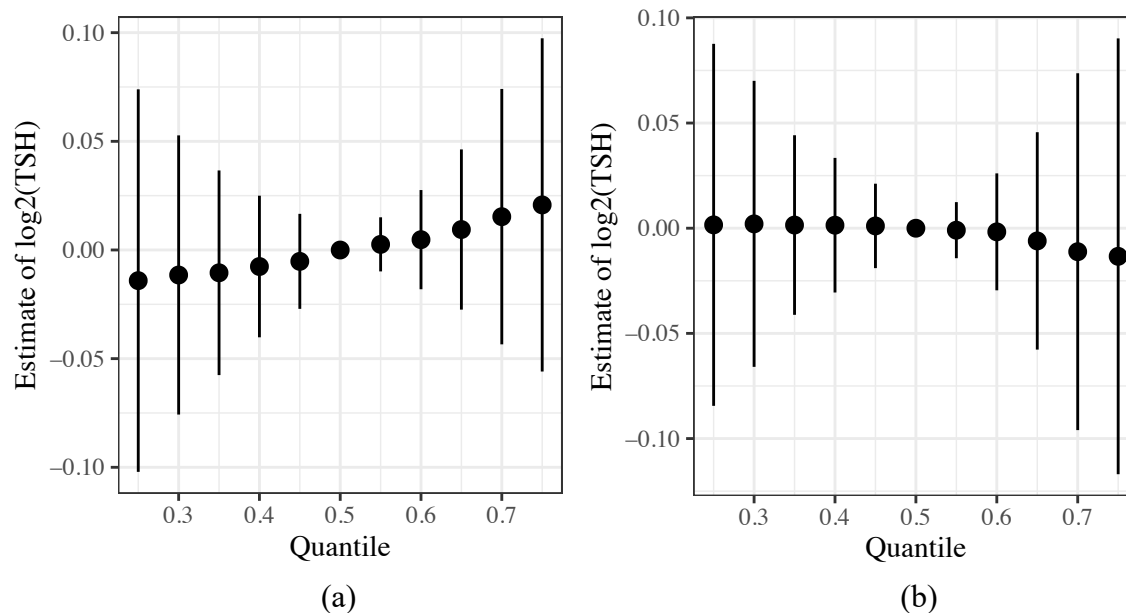

**Figure S6:** Adjusted association of the overall PFAS mixture on cord serum TSH. Models include (a) log<sub>2</sub>-transformed PFOA, PFOS, PFNA, and PFHxS among individuals with PBDE information ( $n = 202$ ) and (b) PFOA, PFOS, PFNA, PFHxS, BDE-28, BDE-47, and PCB-153 among participants with gestational age of PFAS measurement  $< 22$  weeks ( $n = 186$ ). The plots compare the value of the estimate when all the log<sub>2</sub>-transformed PFAS are at the respective quantile compared to when they are at the median. Variation is expressed using 95% CrI. The models have been adjusted for maternal age at delivery, race/ethnicity, marital status at baseline, maternal education level, household income, mean log<sub>10</sub>-transformed cotinine, maternal alcohol usage during pregnancy, nulliparity, maternal body mass index based on pre-pregnancy weight in pounds, the child's sex, gestational week at blood draw for PFAS measurement, and delivery mode. All predictors and continuous covariates were also centered to 0 and scaled to a standard deviation of 1.
